# Supplementary material for: Rational design and investigation of nonlinear optical response properties of pyrrolopyrrole aza-BODIPY-based novel push–pull chromophores
Source: Royal Society of Chemistry journal article supplement (doi:10.1039/d4ra02861a), 2024-01-01
Supplement: d4ra02861a1.pdf [file d4ra02861a1.pdf]

Supporting Information for

**Rational Design and Investigation of Nonlinear Optical Response Properties of  
Pyrrolopyrrole Aza-BODIPY-Based Novel Push-Pull Chromophores**

**Naga Pranava Sree Kothoori<sup>1</sup>, Pandiyan Sivasakthi<sup>1,3</sup>, Mallesham Baithy<sup>1</sup>, Ramprasad  
Misra<sup>2,\*</sup>, and Pralok K. Samanta<sup>1,3,\*</sup>**

<sup>1</sup>Department of Chemistry, School of Science, Gandhi Institute of Technology and  
Management (GITAM), Hyderabad-502329, India

<sup>2</sup>Institute for Biology, Experimental Biophysics, Humboldt-Universität zu Berlin, Berlin-  
10115, Germany

<sup>3</sup>Department of Chemistry, Birla Institute of Technology and Science Pilani (BITS Pilani),  
Hyderabad Campus, Hyderabad-500078, India

\*Corresponding authors: ramprasad.misra@hu-berlin.de (RM);  
pralokkumar.samanta@hyderabad.bits-pilani.ac.in (PKS)

**Table S1:** Absorption data comparison of Molecules (1-3) using different functionals. The experimental values of the absorption maxima are obtained from Ref.1. All values are in eV. The tuned  $\omega$  values are also mentioned.

| Molecules | <sup>1</sup> Expt. | $\omega^*$ B97XD         | $\omega$ B97XD | CAM-B3LYP | B3LYP | PBE1PBE |
|-----------|--------------------|--------------------------|----------------|-----------|-------|---------|
| Mol-1     | 1.52               | 1.65 ( $\omega=0.0938$ ) | 1.80           | 1.77      | 1.57  | 1.61    |
| Mol-2     | 1.56               | 1.7 ( $\omega=0.0901$ )  | 1.90           | 1.85      | 1.45  | 1.53    |
| Mol-3     | 1.70               | 1.79 ( $\omega=0.0961$ ) | 2.03           | 1.98      | 1.60  | 1.67    |

**Table S2:** Values of  $\mu$ ,  $\alpha_{av}$ ,  $\beta_{total}$  and  $\beta_{vec}$  of molecules (1-3) obtained using the  $\omega^*$ B97XD tuned functional and 6-31g(d) basis set

| Molecule | $\mu$<br>(in Debye) | $\alpha_{av}$<br>(in a.u.) | $\beta_{tot}$<br>(in a.u.) | $\beta_{vec}$<br>(in a.u.) | $\beta_{vec}/\beta_{tot}$ |
|----------|---------------------|----------------------------|----------------------------|----------------------------|---------------------------|
| Mol-1    | 0.00077             | 1359.01433                 | 8.76496                    | 7.74446                    | 0.88357                   |
| Mol-2    | 0.00385             | 1627.14600                 | 76.61045                   | -74.29291                  | -0.96975                  |
| Mol-3    | 0.00137             | 1258.85700                 | 5.26522                    | -2.61715                   | -0.49706                  |

**Table S3:** The x, y and z components of dipole moment and hyperpolarizability of molecules (1-3) as obtained using the  $\omega$ \*B97XD tuned functional and 6-31g(d) basis set

| Molecule | $\mu_x$  | $\mu_y$  | $\mu_z$  | $\beta_x$ | $\beta_y$ | $\beta_z$ |
|----------|----------|----------|----------|-----------|-----------|-----------|
| Mol-1    | -0.00029 | -0.00005 | -0.00008 | -8.54920  | 1.90096   | 0.34938   |
| Mol-2    | 0.0014   | -0.00044 | 0.00014  | -74.30075 | 6.34580   | -17.55820 |
| Mol-3    | 0.00002  | -0.00040 | 0.00036  | 4.28012   | 1.27342   | -2.78954  |

**Table S4:** HOMO, LUMO and energy gap ( $\Delta E_{HL}$ ) of PPAB (1-3) molecules in eV in chloroform.

| Molecules | HOMO   | LUMO   | $\Delta E_{HL}$ |
|-----------|--------|--------|-----------------|
| PPAB-1    | -6.208 | -2.028 | 4.180           |
| PPAB-2    | -6.178 | -2.273 | 3.905           |
| PPAB-3    | -6.341 | -2.165 | 4.176           |

**Table S5:** HOMO, LUMO and energy gap ( $\Delta E_{HL}$ ) of PPAB molecules in eV in toluene.

| Molecules | HOMO   | LUMO   | $\Delta E_{HL}$ |
|-----------|--------|--------|-----------------|
| PPAB-1    | -6.151 | -1.979 | 4.172           |
| PPAB-2    | -6.156 | -2.218 | 3.938           |
| PPAB-3    | -6.299 | -2.113 | 4.186           |

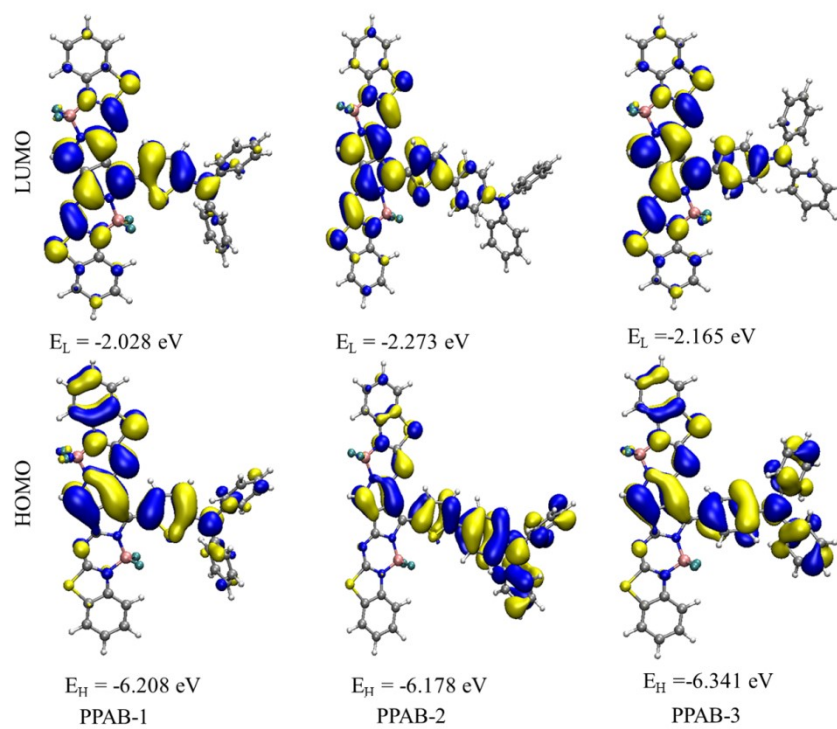

**Fig. S1** The HOMO and LUMO picture of PPAB (1-3) in chloroform with their energies.

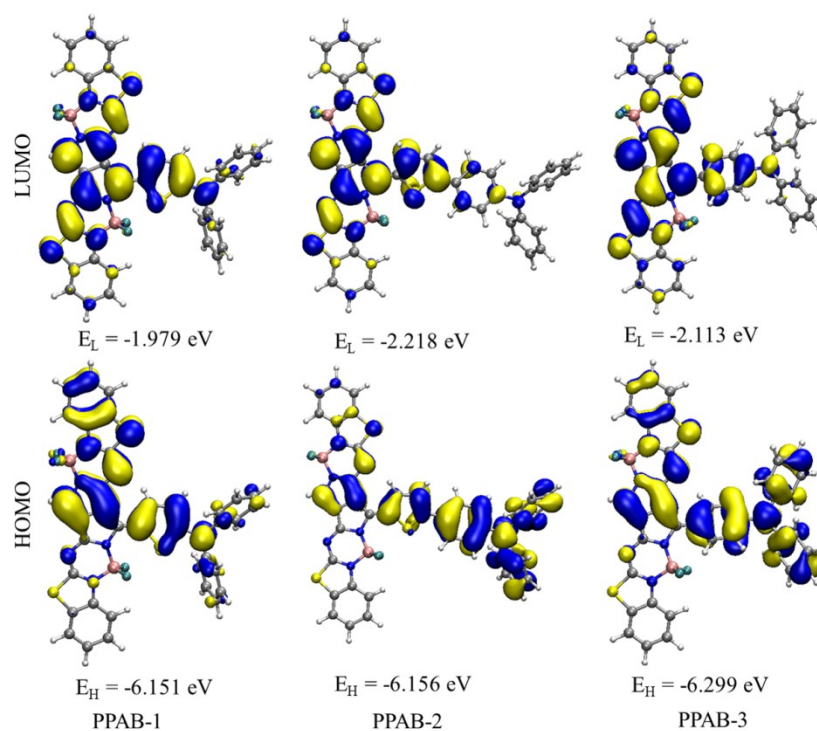

**Fig. S2** The HOMO and LUMO picture of PPAB (1-3) in toluene with their energies.

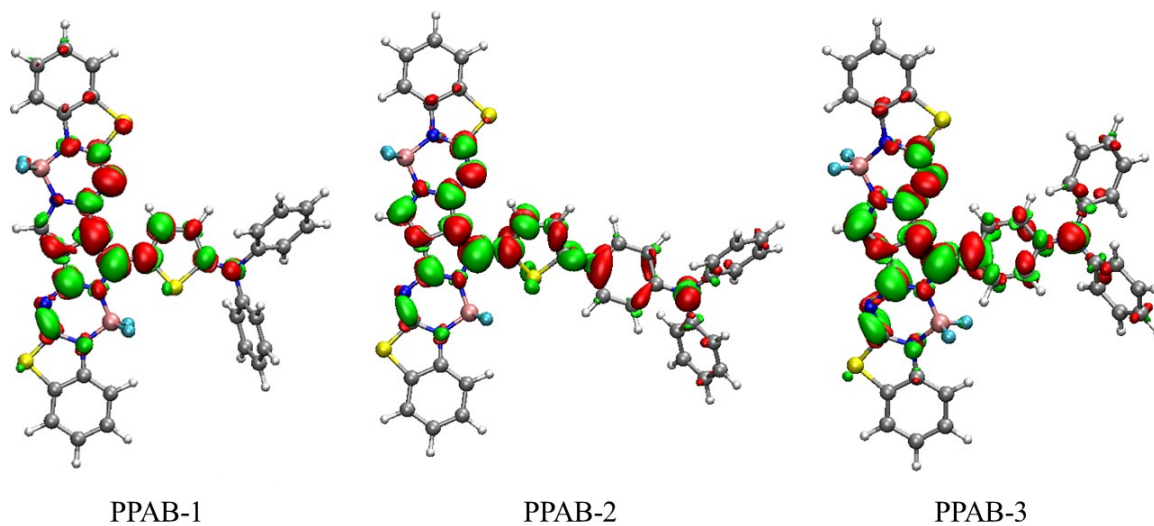

**Fig. S3** The Electron density for PPAB molecules in acetonitrile. (Isovalue=0.001, +ve = green, -ve = red).

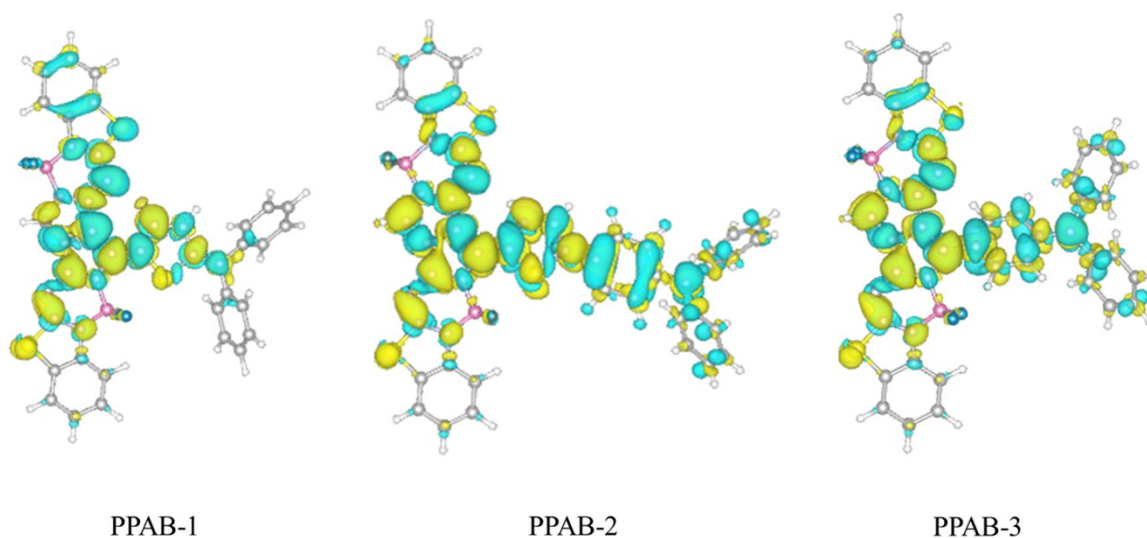

**Fig. S4** The charge density difference of PPAB molecules in acetonitrile. (Isovalue=0.0005, +ve = yellow, -ve = blue).

## Reference

- 1 Y. Wang, S. Mori, H. Nakanotani, C. Adachi and S. Shimizu, Post-Modification of Pyrrolopyrrole Aza-BODIPY toward High Near-Infrared Fluorescence Brightness, *Org. Lett.*, 2023, **25**, 3040–3044.
